RESEARCH ARTICLE

# Exploring the contribution of straw utilization to carbon emission reduction in Anhui Province (China)

Zhou Ye, Xiaohang Yu, Ruoyun Yao, Youzhi Yao \*

College of Materials Engineering, Wuhu Vocational Technical University, Wuhu, China

\* [yaoyz@whit.edu.cn](mailto:yaoyz@whit.edu.cn)

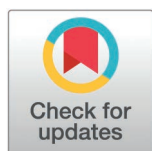

## Abstract

Taking various prefecture-level cities in Anhui Province as the subject of this study, this research draws on data from the ‘Anhui Statistical Yearbook’ to analyze crop straw resources’ potential full utilization, and spatial distribution characteristics, in Anhui Province for the year 2023. The carbon neutralizing effect of straw full utilization was also evaluated using life cycle assessment. Results indicate that the total theoretical straw resources from major crops in Anhui Province in 2023 amounted to  $5.213 \times 10^7$  tons (t), dominated by wheat, rice, and corn straw; which collectively accounted for 89.72% of the total. The carbon emission reductions from straw utilization through fertilization, animal feed, energy generation, substrate application, and raw material processing were approximately  $4 \times 10^6$ ,  $1.07 \times 10^6$ ,  $5.8 \times 10^5$ ,  $9.8 \times 10^4$ , and  $1.67 \times 10^5$  t of CO<sub>2</sub>, respectively. Clarifying the total amount, types, potential utilization, and spatial distribution of straw resources at the city level is essential for promoting rational resource allocation and facilitating logical regional planning for the utilization of those resources. These findings are of paramount importance towards efforts to achieve the goals of “Carbon peaking and carbon neutrality” (Dual-carbon) and fostering coordinated economic and social development in China. Under the framework of “dual carbon” national strategy and the overall layout of agricultural carbon emission reduction, the data analysis results of straw resource utilization in Anhui Province can serve as a reference for other regions to carry out relevant work.

## OPEN ACCESS

**Citation:** Ye Z, Yu X, Yao R, Yao Y (2026) Exploring the contribution of straw utilization to carbon emission reduction in Anhui Province (China). PLoS One 21(5): e0349747. <https://doi.org/10.1371/journal.pone.0349747>

**Editor:** Paulo H. Pagliari, University of Minnesota, UNITED STATES OF AMERICA

**Received:** September 13, 2025

**Accepted:** May 5, 2026

**Published:** May 27, 2026

**Copyright:** © 2026 Ye et al. This is an open access article distributed under the terms of the [Creative Commons Attribution License](https://creativecommons.org/licenses/by/4.0/), which permits unrestricted use, distribution, and reproduction in any medium, provided the original author and source are credited.

**Data availability statement:** All data included within the paper itself.

**Funding:** This work is financially supported by Key Research Project of Anhui Provincial Department of Education (2025AHGXZK30446), Wuhu Technology Research and Development Center (WHSYFZX202307), Wuhu Institute of Technology Key Scientific Research Project

## 1. Introduction

The goal of Carbon peaking and carbon neutrality (“Dual-carbon”), as the core strategy of Chinese ecological civilization construction, is not only a solemn commitment to address global climate change, but also a key lever for promoting green socio-economic transformation. In 2021, the Chinese government explicitly proposed to “build a clean, low-carbon, safe and efficient energy system, and accelerate innovation in agricultural green development models” [1]. The agriculture, forestry and other

(wyzyrzd202508). The funders had no role in study design, data collection and analysis, decision to publish, or preparation of the manuscript.

**Competing interests:** The authors declare no conflicts of interest.

land use (AFOLU) sector even contributed 22% of global anthropogenic net greenhouse gas emissions in 2019, becoming an important key area for China to achieve the “dual carbon” goals [2]. Agriculture, as an important sector of carbon emissions, accounts for about 15% of the total national carbon emissions in terms of greenhouse gases, while also possessing dual attributes of carbon source and sink [3–6]. Greenhouse gases (such as methane and nitrous oxide) released from agricultural production interact with the soil’s carbon sequestration potential, which can both contribute to increased greenhouse gas emissions and enhance carbon sequestration potential through soil management and straw returning [7]. In this context, promoting the resource utilization of agricultural waste (e.g., straw) serves as a critical link between the “Dual-carbon” goals and the circular economy. On one hand, converting waste into bioenergy or soil amendments can reduce dependence on fossil fuels, enhance carbon sinks, and directly contribute to emission reductions. On the other hand, it embodies the principles of the circular economy by creating value from by-products.

Straw is the main waste in agricultural production, containing elements such as nitrogen, phosphorus, potassium, and calcium; as well as organic matter such as cellulose and hemicellulose. It has the property of carbon neutrality and has the potential for multiple utilization pathways [8]. Due to factors such as seasonality, dispersion, the unwillingness of growers to collect it, and the high costs associated with its collection, the utilization effect of straw resources is not satisfactory. The indiscriminate disposal of, and open burning of, straw has been repeatedly banned; as these practices contribute significantly to aggregate carbon emissions (Burning a ton of straw releases approximately 1.5 t of CO<sub>2</sub> eq·t<sup>-1</sup> tons), this exacerbates haze pollution (accounting for 20%–30% of the regional PM<sub>2.5</sub> contribution) thereby threatening ecological security and public health. The continuous mechanization of straw returning to the field annually has exceeded the soil’s carrying capacity and increased the risk of pests and diseases in sunsequent crops [9–11]. Therefore, improper disposal of straw not only causes waste of straw resources, but also has an adverse impact on the ecological environment [12]. To address the environmental and carbon emission problems caused by open straw burning, China has gradually established a policy system from local control to nationwide strict governance. The implementation stages of the ban on open straw burning can be divided into the incidental control stage before 2010, the policy improvement stage from 2010 to 2013, and the nationwide high-intensity implementation stage after the issuance of the “Action Plan for Air Pollution Prevention and Control” in 2013. Driven by national policies, remarkable achievements have been made: the fire carbon emissions from open burning of wheat straw in the North China Plain alone decreased by 3 Mt CO<sub>2</sub>-eq a<sup>-1</sup> from 2017 to 2021 compared with 1997–2016, while the global carbon emissions from biomass burning showed an upward trend during the same period [13], demonstrating the effectiveness of China’s agricultural carbon emission control policies. Straw is beneficial when utilized, but harmful when discarded [14]. Existing research on straw utilization has primarily concentrated on its methods, namely the “Five-transformations” utilization mode of “fertilization, feed conversion, energy conversion, base materials, and raw materials” [15]. The efficient resource utilization of straw is not only an urgent

need for pollution reduction and carbon reduction in the agricultural field, but also one of the necessary ways to achieve the “Dual-carbon” goal.

Domestic and foreign scholars have conducted extensive research on the environmental benefits of straw resource utilization. Life cycle assessment (LCA), as an internationally recognized method for quantifying environmental impacts, is used to evaluate the carbon footprint and resource efficiency of pathways such as straw returning, energy conversion (such as biomass power generation), and material conversion (such as sheet manufacturing) [16]. For example, as the largest renewable energy source in the European Union-biomass energy, 14% of it comes from agricultural raw materials [17]. According to reports,  $4.95 \times 10^8$  t of straw can produce  $8.225 \times 10^{10}$  m<sup>3</sup> of biomethane [18]. However, existing research mostly focuses on the evaluation of a single technological path, lacking systematic analysis of regional and multi scenario scenarios, especially the potential of straw resource utilization and carbon sequestration and emission reduction using LCA methods at the city scale has not been reported. How to construct a “Dual-carbon” oriented multi-level utilization model for straw based on regional resource endowment has become an urgent problem to be solved [19].

This work took Anhui Province as an example, using the “Anhui Statistical Yearbook” and authoritative documents published by various ministries and commissions in China. Based on the analysis of the quantity, composition, spatial distribution, and demand for fully quantified utilization of straw resources in various prefecture level cities in Anhui Province in 2023 [20], the article focuses on the carbon reduction emissions, carbon neutrality intensity, and the potential for carbon sequestration and emission reduction throughout the entire life cycle of straw utilization. The aim is to reveal the “Dual-carbon” synergistic efficiency mechanism of straw utilization, provide scientific basis for Anhui Province to formulate differentiated straw management policies, promote agricultural green and low-carbon transformation, and also provide reference paradigms for optimizing the path of agricultural waste resource utilization in similar regions, and it provides practical cases for the regional implementation of the national agricultural carbon emission reduction strategy.

## 2. Data sources

### 2.1. Research area

Anhui Province belongs to the transitional monsoon climate between warm temperate and subtropical regions, with distinct four seasons and abundant precipitation but uneven spatial and temporal distribution, with an average temperature of around 18 °C. The total land area of the province is about  $1.401 \times 10^5$  km<sup>2</sup>. According to the “Anhui Provincial Land Spatial Planning (2021–2035),” the cultivated land ownership is  $\geq 5.41 \times 10^6$  hm<sup>2</sup>. The layout of crops in Anhui Province presents a pattern of “northern wheat and southern rice, oil cotton along the Yangtze River, and tea and fruit in mountainous areas.” In 2022, the total planting area of crops in the province was about  $9.334 \times 10^6$  hm<sup>2</sup>, including  $7.314 \times 10^6$  hm<sup>2</sup> of grain crops. The economic crops include  $5.618 \times 10^5$  hm<sup>2</sup> of oilseeds (70% of which are rapeseed),  $1.025 \times 10^5$  hm<sup>2</sup> of vegetables, and  $9.89 \times 10^4$  hm<sup>2</sup> of fruits, which belong to a typical sustainable agricultural optimization development zone [21].

### 2.2. Data sources

The basic data for this study comes from the main crop yields, partitioned cultivated land areas, and collectable straw resources published in the 2023 Anhui Statistical Yearbook [20], mainly including seven major crops such as rice plant, wheat, corn, legume, tubers, oilseeds, and cotton. The grain-straw ratio and collectable coefficient are sourced from the straw resource ledger system of the Ministry of Agriculture and Rural Affairs [22], as shown in Table 1.

## 3. Research methods

### 3.1. Estimation of theoretical resource quantity of straw

The theoretical resource quantity of straw refers to the total amount of stem and leaf agricultural by-products remaining after harvest, excluding the edible parts, and does not include the resource quantity of later precision processing and crop

**Table 1. Grain-straw ratio and Collectible Coefficient of Major Crops in Anhui Province.**

| Major Crops | Grain-straw ratio | Collectable coefficient |
|-------------|-------------------|-------------------------|
| Rice plant  | 0.84              | 0.77                    |
| Wheat       | 1.14              | 0.85                    |
| Corn        | 1.00              | 0.91                    |
| Legume      | 1.47              | 0.56                    |
| Tubers      | 0.46              | 0.73                    |
| Oilseeds    | 1.22              | 0.83                    |
| Cotton      | 2.75              | 0.94                    |

<https://doi.org/10.1371/journal.pone.0349747.t001>

roots. It is closely related to the economic yield of straw and the grain-straw ratio [23]. The theoretical resource quantity of straw is determined by the product of crop yield and the grain-straw ratio coefficient, and its specific expression formula is shown in (1):

$$S_R = S_{EQ} \times S_G \quad (1)$$

In the formula:  $S_R$  is the theoretical resource quantity of crop straw (t),  $S_{EQ}$  is the economic yield of crops (t),  $S_G$  is the ratio coefficient of grain-straw.

### 3.2. Estimation of collectable resources of crop straw

The amount of straw that can be collected refers to the maximum amount of straw resources that can be collected from the field through mechanical and manual harvesting techniques, and can be used by humans. The calculation formula for the amount of crop straw that can be collected is as follows:

$$S_P = S_R \times S_C \quad (2)$$

In the formula,  $S_P$  represents the amount of straw that can be collected (t),  $S_C$  represents the coefficient of straw that can be collected.

### 3.3. Estimation of Carbon Sequestration and Emission Reduction through Fully Quantitative Utilization of Straw

The fully quantified utilization of straw for carbon reduction refers to the reduction of  $CO_2$  emissions during the resource utilization of straw, including  $CO_2$  emissions caused by replacing open burning,  $CO_2$  emissions throughout the life-cycle of straw substitutes, carbon sinks caused by straw resource utilization, and  $CO_2$  emissions throughout the entire life-cycle process. The carbon emissions caused by open-air burning of straw are  $0.802 \text{ t } CO_2 \text{ eq} \cdot \text{t}^{-1}$  [24,25], other parameters used in the calculation process are shown in Tables 2 and 3.

$$CQ_i = (CS_i - CE_i + CR_i \times r_i) \times SU_i \quad (3)$$

In the formula,  $CQ_i$  is the amount of  $CO_2$  that can be reduced when straw is utilized in the  $i$ -th way ( $\text{t } CO_2 \text{ eq}$ ),  $CS_i$  is the carbon sink coefficient ( $\text{t } CO_2 \text{ eq} \cdot \text{t}^{-1}$ ) for the  $i$ -th utilization of crop straw,  $CE_i$  is the carbon emission coefficient ( $\text{t } CO_2 \text{ eq} \cdot \text{t}^{-1}$ ) for the entire lifecycle of crop straw when utilized in the  $i$ -th way,  $CR_i$  is the carbon emission coefficient ( $\text{t } CO_2 \text{ eq} \cdot \text{t}^{-1}$ ) of the entire life-cycle of the substitute used for the  $i$ -th method of utilizing crop straw,  $r_i$  is the straw substitution coefficient,  $SU_i$  is the quantity (t) of crop straw utilized in the  $i$ -th way.

**Table 2. Carbon sink and carbon emission coefficients of straw full quantification utilization process [4,26–28].**

| Utilization ways of straw        |                            | CE <sub>i</sub>        | Category (to the field)     | CS <sub>i</sub> |
|----------------------------------|----------------------------|------------------------|-----------------------------|-----------------|
| <b>Fertilizer (to the field)</b> | Root stubble returning     | 0.004                  | Returning straw             | 0.147           |
|                                  | Crushing and covering      | 0.011                  |                             |                 |
|                                  | -                          | Returning to the field |                             |                 |
|                                  | Deep plowing and returning | 0.028                  |                             |                 |
|                                  | Rotary tillage returning   | 0.021                  |                             |                 |
| <b>Feed</b>                      | -                          | 0.074                  | Returning manure            | 0.132           |
| <b>Energy</b>                    | briquette fuels            | 0.090                  | -                           | -               |
|                                  | Bundle heating             | 0.042                  | -                           | -               |
|                                  | fuel ethanol               | 0.131                  | -                           | -               |
|                                  | biogas engineering         | 0.139                  | Returning biogas residue    | 0.513           |
|                                  | gasification               | 0.146                  | Returning charcoal          | 0.804           |
| <b>Basic material</b>            | -                          | 0.141                  | Returning bacterial residue | 0.598           |
| <b>Raw material</b>              | Artificial plate           | -0.362                 | Reduce logging              | 0.308           |
|                                  | papermaking                | 0.711                  |                             | 0.290           |

**Note:** The accounting boundary of CE<sub>i</sub> is the CO<sub>2</sub> emissions from the entire process of straw harvesting, returning to the field, harvesting, storage, transportation, processing, transformation, and utilization.

<https://doi.org/10.1371/journal.pone.0349747.t002>

**Table 3. Substitution coefficients of straw substitutes and their carbon emission coefficients throughout their entire lifecycle [29–34].**

| Substitutes                       | ri                    | CR <sub>i</sub> /(t CO <sub>2</sub> eq·t <sup>-1</sup> ) |
|-----------------------------------|-----------------------|----------------------------------------------------------|
| <b>Nitrogenous fertilizer</b>     | 0.007                 | 0.577                                                    |
| <b>Phosphate fertilizer</b>       | 0.002                 | 0.173                                                    |
| <b>Potash fertilizer</b>          | 0.001                 | 0.049                                                    |
| <b>Concentrated feed</b>          | 0.300                 | 0.192                                                    |
| <b>Sawdust</b>                    | 1.000                 | 0.144                                                    |
| <b>Traditional wooden board</b>   | 1.200                 | 0.283                                                    |
| <b>Traditional paper</b>          | 2.358                 | 1.125                                                    |
| <b>Briquette fuels</b>            | Replace standard coal | 0.598                                                    |
| <b>Bundle straw</b>               |                       | 0.647                                                    |
| <b>Biogas</b>                     |                       | 0.256                                                    |
| <b>Pyrolysis gasification gas</b> |                       | 0.182                                                    |
| <b>Fuel ethanol</b>               | Replace gasoline      | 0.124                                                    |
|                                   |                       | 3.088                                                    |

**Note:** The accounting boundary of CR<sub>i</sub> is the CO<sub>2</sub> emissions from the entire process of raw material extraction, processing, manufacturing, use, maintenance, and final disposal of substitutes.

<https://doi.org/10.1371/journal.pone.0349747.t003>

### 3.4. Estimation of carbon neutrality intensity in the full quantitative utilization of straw

The carbon neutrality intensity of fully quantified utilization of straw refers to the amount of CO<sub>2</sub> that can be neutralized per unit area when crop straw is used for fertilizer, feed, and energy utilization. The larger the value, the stronger the carbon neutrality ability of the region. The specific calculation formula is as follows:

$$CNI = CQ_i/A \tag{4}$$

In the formula, CN<sub>I</sub> represents the carbon neutrality intensity of crop straw resource utilization potential (t CO<sub>2</sub> eq·hm<sup>-2</sup>); A is the area of the region (hm<sup>2</sup>).

## 4. Results and analysis

### 4.1. Main crop straw resources and composition in Anhui Province

According to the 2023 Anhui Provincial Statistical Yearbook, the theoretical resource quantity of crop straw was calculated using formula (1) based on the crop yields of various types in each city, as shown in Table 4. The comparison between the collectable amount of straw and the collectable resource quantity calculated using formula (2) is shown in Fig 1. The theoretical resource quantity of straw in the province is about  $5.213 \times 10^7$  t, with a collection rate of 93.1%. Among them, the proportion of cereal straw is nearly 90%, wheat straw is about  $2.402 \times 10^7$  t, rice straw is about  $1.497 \times 10^6$  t and corn straw is about  $7.781 \times 10^6$  t. These three contribute a total of about  $4.677 \times 10^7$  t, which can provide a solid raw material foundation for soil organic matter improvement, feed processing, and biomass energy conversion. At the same time, there are about  $3.477 \times 10^6$  t of oil crop straw, 167.9 t of legume straw, and about  $2.0 \times 10^5$  t tons of other crops such as potatoes and cotton and hemp, totaling about  $5.356 \times 10^6$  tons, providing diversified utilization possibilities for biobased boards, composite materials, and fermentation production.

The planting area, yield, and proportion of straw resources of major crops in Anhui Province in 2023 are shown in Fig 2. It can be seen that the straw resources in Anhui Province present a pattern of “grain dominated, non grain supplemented” distribution, with advantages in the northern wheat belt, rice concentration area, and northern Anhui corn area. The southern oilseed area and scattered bean area have promising potential for deep processing and refined utilization. This resource structure not only provides a quantitative basis for the path selection of straw

Table 4. Theoretical resource quantity data of various crop straw in Anhui Province.

| Region       | Total (tons)   | Grain (tons)   |                 |                |                |              | Oilseeds (tons) | Cotton (tons) |
|--------------|----------------|----------------|-----------------|----------------|----------------|--------------|-----------------|---------------|
|              |                | Cereals        |                 |                | Legume         | Tubers       |                 |               |
|              |                | Rice plant     | Wheat           | Corn           |                |              |                 |               |
| Hefei        | 3446655        | 2069296        | 844720          | 119170         | 36913          | 6698         | 364033          | 5825          |
| Huaibei      | 2049735        | -              | 1422483         | 480774         | 135055         | 433          | 10979           | 10            |
| Bozhou       | 6885884        | 19503          | 4462443         | 1967838        | 314340         | 8043         | 113438          | 280           |
| Suzhou       | 6285961        | 7552           | 3868848         | 1765752        | 361613         | 22884        | 259241          | 70            |
| Bengbu       | 4136530        | 584109         | 2146114         | 748772         | 64617          | 1881         | 591036          | 2             |
| Fuyang       | 7113292        | 318324         | 4575437         | 1686697        | 381346         | 13832        | 137176          | 480           |
| Huainan      | 3668325        | 1767016        | 1690707         | 71345          | 55082          | 2049         | 82127           | -             |
| Chuzhou      | 5642655        | 2421606        | 2573827         | 252456         | 111539         | 6645         | 276438          | 145           |
| Lu'an        | 4026723        | 2498090        | 1033431         | 176836         | 46011          | 3766         | 265514          | 3075          |
| Maanshan     | 1283752        | 740170         | 357646          | 15398          | 11960          | 4248         | 153458          | 870           |
| Wuhu         | 1660648        | 1040751        | 298310          | 71501          | 21170          | 3257         | 212294          | 13365         |
| Xuancheng    | 1458579        | 923182         | 310751          | 48282          | 21836          | 5747         | 148781          | -             |
| Tongling     | 720213         | 456500         | 80378           | 31026          | 12257          | 1087         | 131426          | 7540          |
| Chizhou      | 839153         | 511314         | 82063           | 53103          | 21486          | 2275         | 165427          | 3485          |
| Anqing       | 2548713        | 1431972        | 274712          | 201336         | 64892          | 9891         | 499878          | 66030         |
| Huangshan    | 363571         | 181759         | -               | 90838          | 19487          | 5193         | 66144           | 150           |
| <b>Total</b> | <b>5213088</b> | <b>1497143</b> | <b>24021871</b> | <b>7781125</b> | <b>1679605</b> | <b>97930</b> | <b>3477388</b>  | <b>101327</b> |

<https://doi.org/10.1371/journal.pone.0349747.t004>

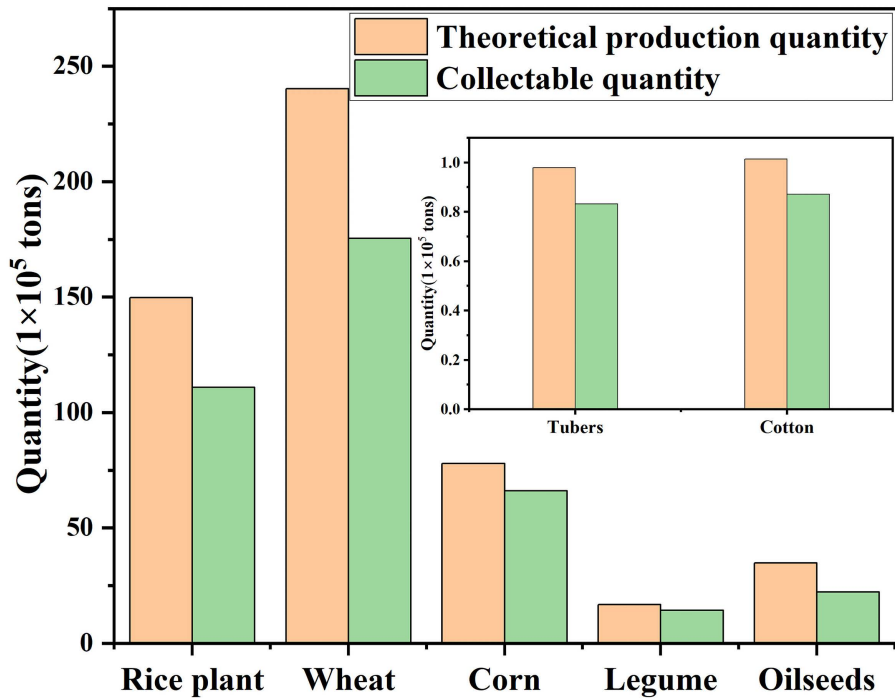

Fig. 1. Theoretical and Collectable Quantity of Straw in the Province.

<https://doi.org/10.1371/journal.pone.0349747.g001>

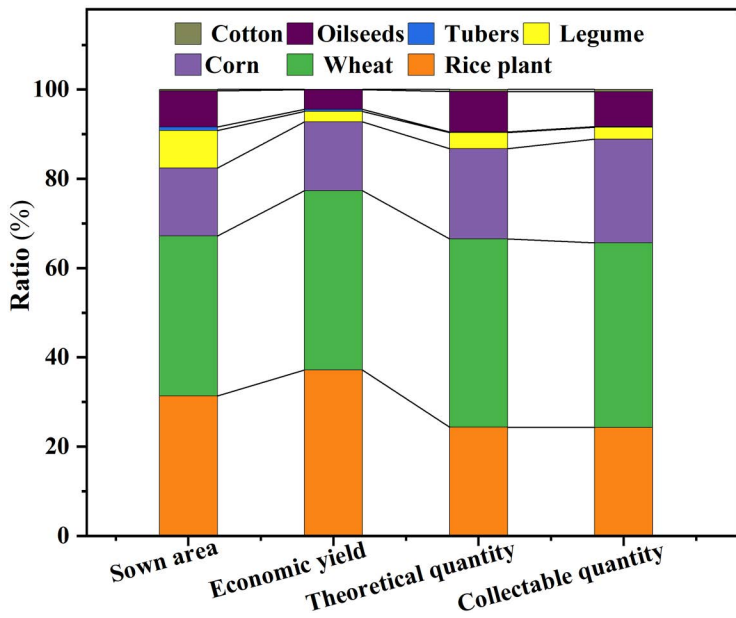

Fig. 2. Sowing area, yield, and proportion of straw resources of major crops in Anhui Province in 2023.

<https://doi.org/10.1371/journal.pone.0349747.g002>

returning, feed utilization, and energy utilization under the background of “carbon peak and carbon neutrality,” but also lays a solid data foundation for the formulation of unified planning and regional differentiated policies throughout the province.

#### 4.2. Concentration and spatial distribution of collectable resources of main straw in Anhui Province

In 2023, the regional average of collectable straw resources in Anhui Province will be 2440759 t, as shown in Fig 3a. Among them, Fuyang has the largest collectable crop straw resources of 5433427 t, and Huangshan has the smallest collectable crop straw resources of 275152 t, which is only 11.27% of the average level; Among the 16 cities, 8 cities including Hefei, Bozhou, Suzhou, Bengbu, Fuyang, Huainan, Chuzhou, and Lu’an have straw collectible resources that exceed the regional average, while others have not reached the regional average level.

The degree of concentration can be determined by the proportion of straw resources that can be collected in each city to the total area. The ratio multiplied by 100 within 10–14 is the first level region, within 7–10 is the second level region, within 4–7 is the third level region, and within 0–4 is the fourth level region. As shown in Fig 3b, there are four first districts for the collection of crop straw resources, namely Bozhou, Suzhou, Fuyang, and Chuzhou, and two secondary districts, namely Bengbu and Lu’an. There are four third level districts, namely Hefei, Huaibei, Huainan, and Anqing. There are six fourth level districts, namely Ma’anshan, Wuhu, Xuancheng, Tongling, Chizhou and Huangshan, which is mainly due to the fact that the land and planting area of these six cities are less than those of other cities.

In terms of spatial distribution, high potential areas are mainly distributed in the Bozhou-Suzhou-Fuyang plain area of the northern Anhui, with good soil fertility, large crop planting areas, and high mechanization, which concentrates the potential for straw returning to the field. The Bengbu-Wuhu-Chuzhou district in central and eastern Anhui has also shown strong ability to recycle farmland resources. Huangshan, Chizhou, Xuancheng and Tongling, which are due to limited arable land and a high proportion of forestry and fruit industry, the amount of straw that can be collected in the mountainous and hilly areas of southern Anhui is relatively low, forming a low potential area.

#### 4.3. Analysis of full quantitative utilization of straw

In recent years, through policy guidance and technological innovation, Anhui has formed a “diversified and high-value” development path in the field of straw comprehensive utilization. According to the “Technical Guidelines for Total

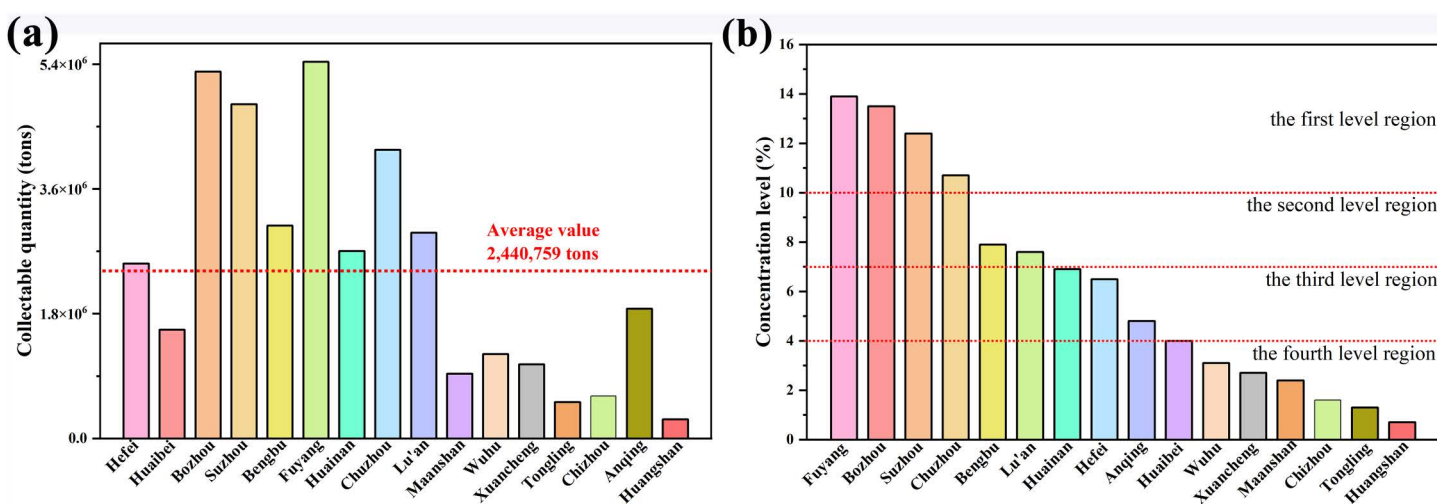

Fig. 3. Straw collection situation (a) collectable resource quantity and average value in each city, and (b) concentration level.

<https://doi.org/10.1371/journal.pone.0349747.g003>

Treatment and Utilization of Regional Crop Straw” released by the Ministry of Agriculture, the recommended range for straw return in the middle and lower reaches of the Yangtze River is 3–9 t/hm<sup>2</sup>. Calculated based on a suitable return amount of 4.5 t/hm<sup>2</sup>, the required amount of straw for fertilizer utilization is  $4.20 \times 10^7$  t, accounting for 78.06% of the collectable straw resources and the highest proportion of straw resource utilization. Based on the cultivated land area of each city, the spatial distribution characteristics of the demand for straw fertilization in Anhui Province were estimated. Fuyang has the highest demand for straw fertilization, followed by Bozhou and Chuzhou, mainly due to its relatively large cultivated land area.

The fertilizer utilization mainly adopts the “crushing and returning to the field technology” to treat straw. The technical standard requires a crushing length of  $\leq 10$  cm, combined with deep plowing of 20 cm, and the addition of fast rot agent (30 kg/hm<sup>2</sup>) and organic fertilizer (900 kg/hm<sup>2</sup>) to achieve rapid improvement of soil organic matter. It is also possible to convert discarded straw into high value-added commercial fertilizers through the production of straw charcoal based fertilizers and bacterial residue organic fertilizers.

The main challenge facing fertilizer utilization is balancing the cost of returning farmland with long-term effects. In response, Anhui Province has increased farmers’ participation and ensured the implementation of technology through a monitoring network for farmland quality and subsidies for deep plowing.

Feed utilization is a successful example of high-value transformation of straw in Anhui Province. In 2023, the conversion volume of the “straw-to-feed” project in the province will exceed  $6 \times 10^6$  t, accounting for more than 16% of the total straw utilization in the province, and driving the formation of a 12 billion yuan output value industrial chain. According to the “Technical Guidelines for Total Treatment and Utilization of Regional Crop Straw,” different animal husbandry unit coefficients and straw consumption, as well as the year-end inventory of herbivorous livestock in each city, the straw consumption of sheep is 0.6 t/one/year, and pigs and cattle are calculated as 5 times that of sheep. The spatial distribution characteristics of the demand for straw feed in Anhui Province were estimated. The regions with high demand for straw feed are mainly concentrated in the northern part of Anhui Province, with Fuyang City having the largest demand for straw feed, far greater than other cities. This is the result of policy driven and scale effects.

Energy utilization is the supporting path for the transition to clean energy. Huainan, which has the highest proportion of demand, as an example, energy utilization accounts for 28.4% of the straw consumption structure, mainly through technologies such as biomass power generation, solidified fuel, and pyrolysis gasification to achieve straw resource utilization. Small and mobile devices are rapidly being promoted in rural clean energy projects. Fuyang is piloting the “Straw-Gasification-Clean-Energy” project, where a single village’s gas supply system consumes 500 t of straw annually, meeting the energy needs of 200 households for cooking. This type of project reduces the use of loose coal and improves indoor air quality by replacing wages with gas, with both environmental and health benefits.

Although the utilization of basic materials accounts for a relatively small proportion in the “Five-transformations,” it has significant potential for value enhancement. Anhui Province mainly develops edible mushroom cultivation and seedling substrate. According to statistical yearbook data, the proportion of straw based materials is less than 5%. In 2023, the total amount of edible mushrooms in Anhui Province was  $7.542 \times 10^5$  t, a year-on-year increase of 6.55%, the total demand for straw was  $4.525 \times 10^6$  t. With the development of economy, Yixian of Huangshan, Dongzhi of Chizhou and other places have formed distinctive industrial clusters of edible fungi. The planting area of edible fungi in Dongzhi County is 460 hm<sup>2</sup>, and the output is nearly  $1.3 \times 10^5$  t. The bottleneck of the development of straw based materials lies in “technical standardization” and “market stability,” which leads to a small proportion of straw based material practice. Therefore, local governments have introduced different policies to improve the utilization rate of straw based materials. For example, Hefei has set up special incentive funds to provide equipment renewal subsidies to enterprises that consume more than 500 t of straw annually, accelerating technological penetration.

Anhui straw raw material focuses on the development and utilization of material properties, mainly covering three directions: environmental protection, biobased, and packaging materials. Several enterprises in Anhui have developed

products such as biomass degradation films and straw eco-friendly tableware, with technology sourced from research institutions such as the University of Science and Technology of China and Hefei University of Technology. Bengbu has introduced the technology of “straw fiber mulching film” to effectively solve the problem of residual film pollution in farmland. The challenge of raw material utilization lies in “cost competitiveness” and “market acceptance” for theoretical demand in various regions.

According to the calculation formula and method mentioned above, the carbon emission reductions of different utilization methods are calculated, as shown in Fig 4a. According to formula (3), the “Five-transformations” of straw reduce approximately  $5.915 \times 10^6$  t of CO<sub>2</sub> emissions, while the unused straw generates approximately  $9.50 \times 10^6$  t of CO<sub>2</sub> emissions. By subdividing the “Five-transformations” of straw utilization, the specific carbon emission reductions for straw fertilization, feed utilization, energy utilization, base material utilization, and raw material utilization in Anhui Province in 2023 are calculated to be approximately  $4.00 \times 10^6$ ,  $1.07 \times 10^6$ ,  $5.80 \times 10^5$ ,  $9.80 \times 10^4$ , and  $1.67 \times 10^5$  t of CO<sub>2</sub>, accounting for 67.57%, 18.10%, 9.80%, 1.68%, and 2.85%, respectively. Among them, the use of fertilizers and feed has the largest contribution to emission reduction, accounting for a total of 88.67% of the total emission reduction. Energy conversion follows closely, while the use of base materials and raw materials has the lowest emission reduction, accounting for only 4.53% of the total.

Geographically, the 16 cities of Anhui Province are typically divided into three regions: Northern Anhui (NA) (Suzhou, Huaibei, Bengbu, Fuyang, Huainan, Bozhou), Central Anhui (CA) (Hefei, Lu’an, Chuzhou), and Southern Anhui (SA) (Huangshan, Chizhou, Xuancheng, Ma’anshan, Wuhu, Tongling, Anqing). One-way analysis of variance (ANOVA) was conducted to examine the mean differences in the five resource utilization patterns among the three groups, with the Kruskal-Wallis nonparametric test used for verification. For indicators with significant ANOVA results, the Tukey’s honestly significant difference (HSD) post-hoc test was performed, and subgroups with no significant differences were labeled with lowercase letters (a, b), where distinct letters indicate statistically significant differences at the 0.05 level (Fig 4b).

One-way ANOVA revealed significant regional differences for fertilization ( $F = 7.028$ ,  $p = 0.008$ ), energy conversion ( $F = 12.24$ ,  $p = 0.001$ ), base material utilization ( $F = 12.24$ ,  $p = 0.001$ ), and raw material utilization ( $F = 12.24$ ,  $p = 0.001$ ). No significant difference was found for feed utilization ( $F = 3.012$ ,  $p = 0.083$ ). The Kruskal-Wallis test corroborated these results, showing significant differences for all but feed utilization ( $p < 0.05$ ).

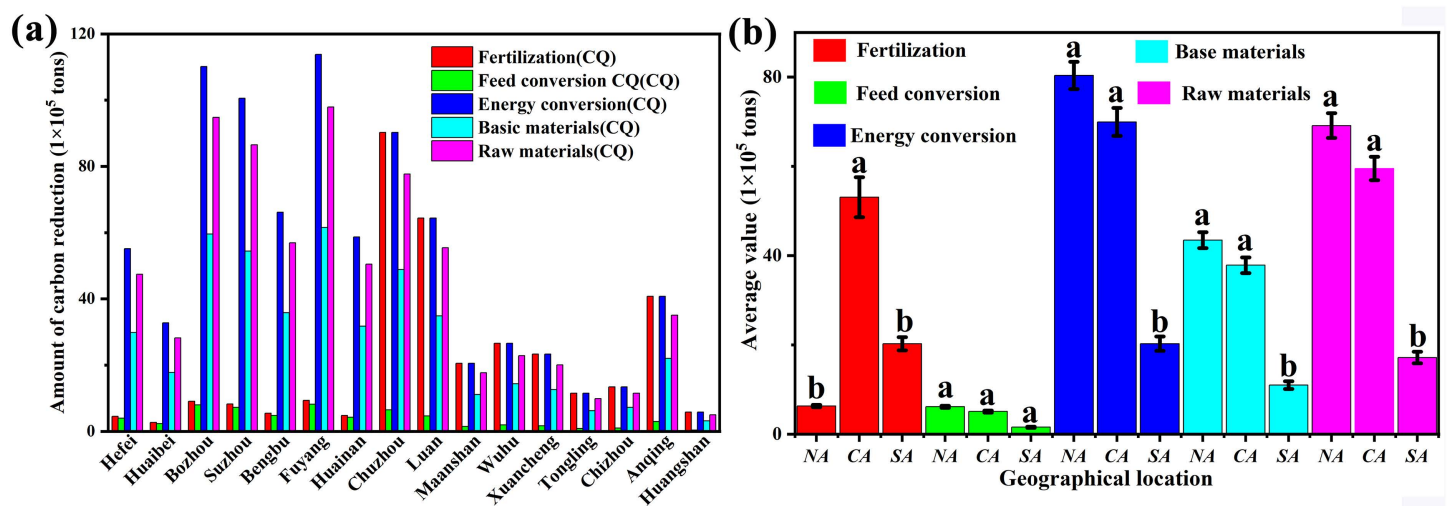

Fig. 4. Analysis of Carbon Emission Reduction (a) Carbon emission reduction from five-transformations in various regions (b) Geographical variation in resource utilization patterns.

<https://doi.org/10.1371/journal.pone.0349747.g004>

Tukey's HSD post-hoc test ( $\alpha=0.05$ ) indicated that for fertilization, the mean value in Central Anhui ( $53.084 \times 10^5$  t) was significantly higher than in Northern ( $6.304 \times 10^5$  t) and Southern Anhui ( $20.257 \times 10^5$  t), while the latter two did not differ significantly (labeling: a, b, b). For energy conversion, base material, and raw material utilization, both Northern Anhui ( $80.37 \times 10^5$  t,  $43.49 \times 10^5$  t,  $69.17 \times 10^5$  t) and Central Anhui ( $69.95 \times 10^5$  t,  $37.84 \times 10^5$  t,  $60.18 \times 10^5$  t) were significantly higher than Southern Anhui ( $20.28 \times 10^5$  t,  $10.97 \times 10^5$  t,  $17.45 \times 10^5$  t), with no significant difference between Northern and Central Anhui. Consequently, Northern and Central Anhui share the label "a", while Southern Anhui is labeled "b" (i.e., a, a, b). Feed utilization showed no significant regional differences, with all regions labeled "a".

#### 4.4. Analysis of carbon neutrality intensity characteristics of straw resource utilization

In the scenario calculation of  $5.213 \times 10^7$  t of collectable straw in the province for returning to the field in 2023, the carbon neutrality intensity (CNI) of the fertilization pathway in Anhui Province showed significant band like differentiation in space, and the differences between different cities were quite significant. The average CNI in the province is about  $0.065$  t CO<sub>2</sub> eq/hm<sup>2</sup>, but the actual values in each city range from  $0.050$  t CO<sub>2</sub> eq/hm<sup>2</sup> to  $0.080$  t CO<sub>2</sub> eq/hm<sup>2</sup>. Chuzhou leads the way with a highest level of  $0.078$  t CO<sub>2</sub> eq/hm<sup>2</sup>, mainly due to the dual advantages of highly concentrated arable land and a mechanization rate of 92% for straw returning. Ma'anshan City closely follows, with a CNI of  $0.075$  t CO<sub>2</sub> eq/hm<sup>2</sup>. The combination of rice rapeseed rotation mode and deep tillage technology in the plow layer significantly increases the soil organic carbon sequestration efficiency of straw compared to other areas in the province. The cities of Hefei and Wuhu along the Yangtze River have achieved a carbon neutrality intensity level of approximately  $0.070$  t CO<sub>2</sub> eq/hm<sup>2</sup>, attributed to their high soil fertility and well-equipped machinery for returning farmland, demonstrating the advantages of the fertilization pathway in plain areas. In contrast, although the amount of straw returned to the fields in Bozhou and Fuyang in the northern Anhui Plain reached  $3.85 \times 10^6$  tons and  $4.2 \times 10^6$  tons respectively, their carbon sequestration efficiency per unit soil area was only  $0.055$ – $0.060$  t CO<sub>2</sub> eq/hm<sup>2</sup> due to their larger arable land area base; In Huangshan, Chizhou and Xuancheng in southern Anhui, due to the undulating terrain and scattered cultivated land, the CNI is mostly lower than  $0.050$  t CO<sub>2</sub> eq/hm<sup>2</sup>.

## 5. Discussions

- 1) Potential for carbon sequestration through fertilization. The main ways of utilizing straw fertilizers include technologies such as root stubble returning, crushing and covering returning, deep plowing returning, and rotary tillage returning. Meta analysis was conducted on the impact of continuous straw returning on soil organic carbon in Chinese farmland. Compared with no straw returning, straw returning significantly increased soil organic carbon content, with an average increase of  $13.97 \pm 1.38\%$  [35–37]. Based on literature research [38–40], assuming that the proportion of straw returning organic carbon fixed in the soil is 10% and the total organic carbon content of straw is 0 The calculated soil carbon sink for returning straw to the field is  $146.8$  g CO<sub>2</sub> eq/kg.
- 2) Potential for carbon sequestration through feed utilization. The main way of utilizing straw as feed is through dry straw and coarse feed, and the study does not currently consider whole plant silage feed for corn. Research has shown that the total organic carbon storage in plots treated with nitrogen, phosphorus, potassium, and farmyard manure increased by 25% and 45%, respectively, compared to plots treated with nitrogen, phosphorus, potassium, and fallow fields [41]. According to studies by different researchers, the carbon sequestration effect of returning livestock and poultry manure to the field is better than directly returning straw, with an organic carbon sequestration rate of 20% to 30% [42]. According to the IPCC guidelines (2006), the digestion rate of ruminants is 55%; The carbon sequestration rate of manure organic carbon in farmland is calculated at 20%, and the indirect carbon sink for straw feed utilization is  $132.0$  g CO<sub>2</sub> eq/kg.

- 3) Energy based carbon sequestration potential. The energy utilization of straw mainly includes technologies such as molded fuel, bundled heating, biogas/biogas, co production of pyrolysis carbon and gas, direct combustion of straw for power generation, and fuel ethanol. Alternative fossil fuels are calculated by offsetting the heat of coal (equivalent to standard coal), based on the unit calorific value of raw coal with a carbon content of 26.37 g /MJ, the carbon oxidation rate is 0.94. Based on the 2006 IPCC Guidelines for National Greenhouse Gas Inventories and referring to the relevant calculation methods for coal emission factors in the Guidelines for the Calculation Methods and Reporting of Greenhouse Gas Emissions of Chinese Power Generation Enterprises (Trial), there are certain differences in greenhouse gas emissions from different straw utilization technologies, and the amount of carbon sequestration in soil as a by-product of large-scale biogas/bio natural gas and pyrolysis carbon gas co production technologies is 513.4, 803.5 g CO<sub>2</sub> eq/kg.
- 4) Carbon sequestration potential of straw based material conversion. The main utilization methods of straw based composting are edible mushroom cultivation and waste mushroom residue composting returning to the field. Related studies have shown that when using straw and soybean straw as partial substitutes for sawdust from broad-leaved trees to cultivate black fungus, with a straw substitution ratio of 25% to 35%, the growth of mycelium and fruiting bodies is basically the same as that of sawdust cultivation from broad-leaved trees [43]. Therefore, the use of straw as a base material can replace some forest resources. According to calculations, the forest carbon sequestration capacity of straw based material utilization as a substitute for forest resources is 462 g CO<sub>2</sub> eq/kg. The carbon loss rate during the mushroom production process is 30% [44]. Assuming that the organic carbon fixation rate of mushroom in farmland is equal to the carbon fixation rate of straw returning, and calculated at 10%, the soil carbon sink of waste mushroom residue returning to farmland is 136.1 g CO<sub>2</sub> eq/kg.
- 5) Raw material carbon sequestration potential. The raw material utilization of straw is mainly focused on artificial boards and papermaking. Currently, the final treatment of waste straw artificial boards or straw paper is mainly used for combustion power generation. The consumption of raw wood for artificial boards is 1.1 m<sup>3</sup> /m<sup>3</sup>, 1 kg of artificial board consumes 1.5 kg, The density of artificial board is 650 kg/m<sup>3</sup> [45], and the amount of forest carbon sink generated by using straw artificial board as a raw material to replace wood logging is 308 g CO<sub>2</sub> eq/kg.

Although the unit straw raw material utilization has the highest carbon sequestration and emission reduction capacity, the current amount of raw material utilization is the least. Governments at all levels should introduce corresponding policies to encourage and support the construction of a group of manufacturers that use crop straw to produce artificial boards and paper, and increase the raw material utilization rate of straw. The carbon neutrality intensity of energy utilization of crop straw in urban areas is the highest, at 0.2–0.7 t CO<sub>2</sub> eq·hm<sup>-2</sup>. Among the five common energy utilization methods, the carbon sequestration and emission reduction capabilities of preparing formed fuels and bundling heating are relatively high. These two energy utilization methods can be prioritized, but the economic benefits brought by producing fuel ethanol are significantly higher than other methods. Therefore, governments at all levels should also encourage the construction of a number of biomass fuel ethanol enterprises. Huangshan, Chizhou and other places are not suitable for crop planting because of their large mountainous area. In addition to the necessary straw returning, the local government should focus on promoting the energy and raw material utilization of straw.

Based on the above analysis, clarifying the total amount, types, full quantitative utilization potential, and spatial distribution characteristics of straw resources in the city is the basis for resource utilization and scientific planning of straw. At the same time, evaluating the emission reduction and carbon fixation under various resource utilization methods from the perspective of the entire life cycle plays an important role in promoting the achievement of local “Dual-carbon” goals and the coordinated development of the economy and society.

From the perspective of the overall national strategy for agricultural carbon emission reduction, the research on straw resource utilization in Anhui Province also provides regional data support for national-level straw governance. As the

world's largest carbon emitter, China's agricultural emission reduction is an important component of achieving the 2030 carbon peak and 2060 carbon neutrality goals [46]. As a key measure for agricultural emission reduction, the large-scale and model-based development of regional practices in straw resource utilization will further promote the carbon emission control in the national agricultural AFOLU sector.

## Supporting information

**S1 Table. Data supporting Fig. 1.** Theoretical and Collectable Quantity of Straw in the Province.  
(DOCX)

**S2 Table. Data supporting Fig. 2.** Sowing area, yield, and proportion of straw resources of major crops in Anhui Province in 2023.  
(DOCX)

**S3 Table. Data supporting Fig 3. Collectable Resource Quantity and Average of Crop Straw in Each City.**  
(DOCX)

**S4 Table. Distribution of Demand for Five-transformations in Each City.**  
(DOCX)

**S5 Table. Data supporting Fig. 4.** Analysis of Carbon Emission Reduction (a) Carbon emission reduction from five-transformations in various regions. (b) Geographical variation in resource utilization patterns.  
(DOCX)

**S6 Table. Carbon neutrality intensity (CNI) characteristics of straw resource utilization in various regions.**  
(DOCX)

## Author contributions

**Conceptualization:** Zhou Ye, Youzhi Yao.

**Data curation:** Xiaohang Yu, Ruoyun Yao.

**Formal analysis:** Zhou Ye.

**Funding acquisition:** Zhou Ye, Youzhi Yao.

**Methodology:** Zhou Ye, Youzhi Yao.

**Project administration:** Xiaohang Yu, Ruoyun Yao.

**Resources:** Zhou Ye, Xiaohang Yu, Ruoyun Yao.

**Software:** Xiaohang Yu, Ruoyun Yao.

**Supervision:** Zhou Ye, Youzhi Yao.

**Validation:** Zhou Ye, Youzhi Yao.

**Visualization:** Zhou Ye.

**Writing – original draft:** Youzhi Yao.

**Writing – review & editing:** Youzhi Yao.

## References

1. Central Committee of the Communist Party of China, State Council. Opinions of the Central Committee of the Communist Party of China and the State Council on fully, accurately, and comprehensively implementing the new development concept and doing a good job in carbon peak and carbon neutrality work. 2021.

2. Pörtner HO, Roberts DC, Adams H, et al. Summary for policymakers. *Climate change 2022: mitigation of climate change*. Cambridge and New York: Cambridge University Press. 2022.
3. Xia LL, Yu CP, Zhu CW. Mitigation Strategies of Greenhouse Gas Emissions from Crop Production in China and the Pathways to Agricultural Carbon Neutrality. *Acta Pedologica Sinica*. 2023;60:1277–88.
4. Huo LL, Yao ZL, Zhao LX. Contribution and potential of comprehensive utilization of straw in GHG emission reduction and carbon sequestration. *Trans Chin Soc Agric Mach*. 2022;53:349–59.
5. Li QC, Huo LL, Yao ZL. Development and application of monitoring system for CO<sub>2</sub> emission dynamics during straw decomposition. *Trans Chin Soc Agric Mach*. 2024;55:399–409.
6. Zhang H, Zhang LW, He ZH. Spatial and temporal distribution and driving factors of agricultural net carbon sinks in Northeast agricultural areas. *J Agric Resour Environ*. 2024;41:505–17.
7. Xia LL, Yan XY, Cai ZC. Research progress and prospect of greenhouse gas mitigation and soil carbon sequestration in croplands of China. *J Agro-Environ Sci*. 2022;39:834–41.
8. Huo LL, Zhao LX, Meng HB, Yao ZL. Study on straw multi-use potential in China. *Trans Chin Soc Agric Eng*. 2019;35:218–23.
9. Dang L, Tong M, Cui YR. Life cycle analysis of energy consumption and greenhouse gas emissions of a 12 MW biomass power plant. *Renew Energy Resour*. 2022;40:586–92.
10. Wang Y, Li L, Kuang FH. County distribution characteristics and resource utilization potential of straw and livestock manure in Sichuan Province. *J Agric Resour Environ*. 2023;40:455–67.
11. Zhu JJ, Lu YC, Zhang YR. Optimization model for site selection of biomass power generation storage stations and purchasing scope based on spatio-temporal fine constraints. *Renew Energy Resour*. 2023;41:1438–45.
12. Li SN, Ji XH, Deng K. Analysis of regional distribution patterns and full utilization potential of crop straw resources. *Trans Chin Soc Agric Eng*. 2020;36:221–8.
13. Wang J, Wang X. A triumph of reducing carbon emission by banning open straw burning. *Sci Bull (Beijing)*. 2023;68(1):18–20. <https://doi.org/10.1016/j.scib.2022.12.029> PMID: 36621434
14. Wang YJ, Bi YY, Gao CY. Collectable amounts and suitability evaluation of straw resource in China. *Sci Agric Sin*. 2010;43:1852–9.
15. Bi YY, Gao CY, Wang HY. Research on the present situation and corresponding strategies of off-field straw collection and comprehensive utilization in China. *Chin J Agric Resour Reg Plan*. 2019;40:1–11.
16. Zhang HY, Gao XH, Wang H. Study on supply chain mode of straw power generation based on life cycle evaluation. *J Henan Agric Univ*. 2024;58:663–73.
17. Kluts IN, Brinkman MLJ, de-Jong SA, Junginger HM (2019) Biomass resources: agriculture. *Advances in Biochemical Engineering/Biotechnology*. Springer Cham 166: 13–26.
18. Sun H, Wang E, Li X, Cui X, Guo J, Dong R. Potential biomethane production from crop residues in China: Contributions to carbon neutrality. *Renewable and Sustainable Energy Reviews*. 2021;148:111360. <https://doi.org/10.1016/j.rser.2021.111360>
19. Zhang YG, Bai YJ. Regional differentiated paths for realizing “double carbon” targets. *Reform*. 2021;11:1–18.
20. Anhui Provincial Bureau of Statistics. *Anhui Statistical Yearbook*. Beijing: China Statistical Publishing House. 2023.
21. National Bureau of Statistics of the People’s Republic of China. *China Statistical Yearbook*. Beijing: China Statistics Press. 2023.
22. General Office of the Ministry of Agriculture and Rural Affairs. Notice of the General Office of the Ministry of Agriculture and Rural Affairs on the Construction of Crop Straw Resource Ledger. 2023.
23. Li ZY, Zheng J, Sui T. Spatial distribution characteristics and resource utilization models of vegetable straw resources in Shandong Province. *J Shandong Agric Univ (Soc Sci Ed)*. 2021;23:90–7.
24. Wang F, Shi ZL, Li X. Discussion on concept, design idea and technology model of regional total straw utilization. *Chin J Agric Resour Reg Plan*. 2016;37:8–12.
25. Sheng YC, Liang Y, He JJ. Estimated Contribution of Comprehensive Utilization of Crop Residues to Carbon Emission Reduction in Yunnan Province. *Value Eng*. 2024;43:1–5.
26. Liang Y, Al-Kaisi M, Yuan JC. Effect of chemical fertilizer and straw-derived organic amendments on continuous maize yield, soil carbon sequestration and soil quality in a Chinese Mollisol. *Agric Ecosyst Environ*. 2021;314:107403.
27. Yang Q, Zhou H, Bartocci P, Fantozzi F, Mašek O, Agblevor FA, et al. Prospective contributions of biomass pyrolysis to China’s 2050 carbon reduction and renewable energy goals. *Nat Commun*. 2021;12(1):1698. <https://doi.org/10.1038/s41467-021-21868-z> PMID: 33727563
28. Zhang X, Zhu Y, Li L. Exploring local straw resource utilization based on LCA from “double carbon” perspective. *Shanxi Agric Univ (Nat Sci Ed)*. 2023;43:65–74.
29. Chen S, Lu F, Wang X. Estimation of greenhouse gases emission factors of China’s nitrogen, phosphate and potash fertilizers. *Acta Ecol Sin*. 2015;35(19). <https://doi.org/10.5846/stxb201402210304>
30. Wang XQ, Liang DL, Wang XD. Estimation of greenhouse gas emissions from dairy farming systems based on LCA. *Trans Chin Soc Agric Eng*. 2012;28:179–84.

31. Huo LL, Tian YS, Meng HB. Life Cycle Assessment Analysis for Densified Biofuel. *Acta Energetica Solaris Sin.* 2011;32:1875–80.
32. Chen S, Yang XG, Li YP. Life-cycle GHG Emissions of Paper in China. *J Beijing Univ Technol.* 2014;40:944–9.
33. Song DL, Houg SP, Wang XB. Nutrient resource quantity of crop straw and its potential of substituting. *J Plant Nutr Fertil.* 2018;24:1–21.
34. Xi B. Quantity of nutrient resources of straw, a major grain crop in Anhui Province, and its potential to replace chemical fertilizers. *South-Central Agric Sci Technol.* 2025;46:151–3.
35. Wang XD, Zhuang JJ, Liu BY, et al. Residue returning induced changes in soil organic carbon and the influential factors in China's croplands: A meta-analysis. *J China Agric Univ.* 2020;25:12–24.
36. Wang Y, Wu P, Mei F, Ling Y, Qiao Y, Liu C, et al. Does continuous straw returning keep China farmland soil organic carbon continued increase? A meta-analysis. *J Environ Manage.* 2021;288:112391. <https://doi.org/10.1016/j.jenvman.2021.112391> PMID: [33823456](https://pubmed.ncbi.nlm.nih.gov/33823456/)
37. Chen J, Wang S, Kroxner F. Spatial analysis of the soil carbon sequestration potential of crop-residue return in China based on model simulation. *J Resour Ecol.* 2019;10:184–95.
38. Liu J, Jiang B, Shen J. Contrasting effects of straw and straw-derived biochar applications on soil carbon accumulation and nitrogen use efficiency in double-rice cropping systems. *Agric Ecosyst Environ.* 2021;311:107286.
39. Truong THH, Kristiansen P, Marschner P. Influence of mulch C/N ratio and decomposition stage on plant N uptake and N availability in soil with or without wheat straw. *J Plant Nutr Soil Sci.* 2019;182(6):879–87. <https://doi.org/10.1002/jpln.201900067>
40. Yao LA, B AK, A JY. Effect of chemical fertilizer and straw-derived organic amendments on continuous maize yield, soil carbon sequestration and soil quality in a Chinese Mollisol. *Agric Ecosyst Environ.* 2021;314:107403.
41. Madhu RIW. Long-term manure application for crop yield stability and carbon sequestration in subtropical region. *Soil Use Manag.* 2021;37:264–76.
42. Tao L, Wen X, Li H, Huang C, Jiang Y, Liu D, et al. Influence of manure fertilization on soil phosphorous retention and clay mineral transformation: Evidence from a 16-year long-term fertilization experiment. *Applied Clay Science.* 2021;204:106021. <https://doi.org/10.1016/j.clay.2021.106021>
43. Zhang P, Zou YJ, Zhao H. Research progress on straw cultivation of black fungus. *Northern Hortic.* 2021;4:124–8.
44. Zhang Y, Tian L, Xu MH. Research progress in comprehensive utilization of spent mushroom substrates. *Microbiol China.* 2020;47:3658–70.
45. Chen HB, Tu XL, Liu SY. Measurement methodology of carbon emission reduction for strawboard project. *Adv New Energy.* 2016;4:373–8.
46. Chen B, Chen F, Ciaias P, Zhang H, Lü H, Wang T, et al. Challenges to achieve carbon neutrality of China by 2060: status and perspectives. *Sci Bull (Beijing).* 2022;67(20):2030–5. <https://doi.org/10.1016/j.scib.2022.08.025> PMID: [36546098](https://pubmed.ncbi.nlm.nih.gov/36546098/)
